# Supplementary material for: Antigenic epitopes and cross-reactivity analysis of tropomyosin from Oratosquilla oratorio
Source: Royal Society of Chemistry journal article supplement (doi:10.1039/d4fo04792c), 2024-01-01
Supplement: d4fo04792c1.pdf [file d4fo04792c1.pdf]

## Supporting Information

### Antigenic epitopes and cross-reactivity analysis of tropomyosin from *Oratosquilla oratorio*

Ling-Na Ni,<sup>a</sup> Fei Huan,<sup>a</sup> Shuai Gao,<sup>a</sup> Meng Liu,<sup>ab</sup> Ming-Xuan Wu,<sup>a</sup> Yi Gu,<sup>a</sup> Dong  
Lai,<sup>c</sup> Qing-Mei Liu,<sup>a</sup> Guang-Ming Liu<sup>\*ab</sup>

<sup>a</sup> College of Ocean Food and Biological Engineering, Xiamen Key Laboratory of  
Marine Functional Food, Fujian Provincial Engineering Technology Research Center  
of Marine Functional Food, Jimei University, Xiamen, Fujian 361021, China

<sup>b</sup> College of Marine Biology, Xiamen Ocean Vocational College, Xiamen,  
Fujian 361100, China

<sup>c</sup> The Second Affiliated Hospital of Xiamen Medical College, Xiamen, Fujian  
361021, China

E-mail: gmliu@jmu.edu.cn; Fax: +86-0592-6180470; Tel: +86-0592-7769301

**Table S1. Antigenic epitopes of *O.oratoria* TM were predicted by bioinformatics tools**

| No <sup>a</sup> | Server               | Position                                                                                                                                                                                                       |
|-----------------|----------------------|----------------------------------------------------------------------------------------------------------------------------------------------------------------------------------------------------------------|
| 1               | NetMHCII pan4.0      | 4~24, 47~75, 82~128, 138~215, 217~245, 250~278                                                                                                                                                                 |
| 2               | NetMHCII 2.3         | 1~19, 87~125, 163~200, 220~243                                                                                                                                                                                 |
| 3               | SYFPEITHI            | 2~30, 54~68, 75~117, 123~152, 159~183, 194~208, 222~240, 250~264                                                                                                                                               |
| 4               | Rankpep              | 3~78, 85~99, 112~126, 128~142, 153~190, 197~214, 221~255, 266~280                                                                                                                                              |
| 5               | DNA star             | 20~42, 47~84, 96~113, 117~140, 156~164, 177~189, 209~233, 244~259, 262~281                                                                                                                                     |
| 6               | ABCpred Server       | 10~25, 19~34, 26~41, 33~48, 44~59, 57~72, 64~79, 75~90, 93~108, 100~115, 106~121, 117~132, 123~138, 132~147, 153~168, 169~184, 179~194, 191~206, 209~224, 215~230, 221~236, 232~247, 248~263, 258~273, 267~282 |
| 7               | BepiPred 3.0 server  | 5~280                                                                                                                                                                                                          |
| 8               | Immunomedicine Group | 56~67, 83~96, 110~118, 149~155, 161~174, 187~193, 195~202, 221~231, 242~255                                                                                                                                    |

<sup>a</sup>No.1~4 mean as predicted T-cell epitope peptides. No.5~8 mean as predicted B-cell epitope peptides.

## Figure S1

|                    |                                                                                      |     |
|--------------------|--------------------------------------------------------------------------------------|-----|
| <i>O. oratoria</i> | MDA IKKKMÇAMKLEKDNAMDRADTLEQQNKEANNRAEK AEEVHNLQKRMÇQLENDLQVQEQ LLIKANTIQL EFKKALÇN  | 80  |
| <i>L. vannamei</i> | MDA IKKKMÇAMKLEKDNAMDRADTLEQQNKEANNRAEK SEEEVHNLQKRMÇQLENDLQVQEQ SLIKANTIQL EFKKALÇN | 80  |
| Consensus          | mdaikkkmqamklekdnamdradtlegqnkeannraek eeevhnlgkrmqqlendldqvqe llkan ql ekdkal n     |     |
| <i>O. oratoria</i> | AEGEVAALNRRICLI EEDLERSEERLNTATTKLAEFASÇAADESERMRKVLENRSLSDEERMDALENÇL KEARFLAEEADR  | 160 |
| <i>L. vannamei</i> | AEGEVAALNRRICLI EEDLERSEERLNTATTKLAEFASÇAADESERMRKVLENRSLSDEERMDALENÇL KEARFLAEEADR  | 160 |
| Consensus          | aegevaalnrriglleedlerseerlntattklaeasqaadesermrkvlenrslsdeermдалenqlkearfлаееadr     |     |
| <i>O. oratoria</i> | KYDEVARKLAMVEADLERAEERAETGESKIVELEEEELRVVGNNLKSLEVSEEKANÇREEAYKEÇIK LTNKLKAAEFARAE   | 240 |
| <i>L. vannamei</i> | KYDEVARKLAMVEADLERAEERAETGESKIVELEEEELRVVGNNLKSLEVSEEKANÇREEAYKEÇIK LTNKLKAAEFARAE   | 240 |
| Consensus          | kydevarklamveadleraeeraetgeskiveleeeelrvvgnnlkslevseekanqreeaykeçik ltnklkaaeарае    |     |
| <i>O. oratoria</i> | FAERSVÇKLQKEVDRIEDELVNEKEKYKSITDELQÇTFSEL SGY                                        | 284 |
| <i>L. vannamei</i> | FAERSVÇKLQKEVDRIEDELVNEKEKYKSITDELQÇTFSEL SGY                                        | 284 |
| Consensus          | faersvçklqkevdrledelevnekekyksitdelqçtfselsgy                                        |     |

**Figure S1.** Sequence alignment of TM in *O. oratoria* and *L. vannamei*. The sequence alignment result was analyzed by DNAMAN. The homology with 100% is colored dark blue and the homology  $\geq 50\%$  is colored light blue. The result of sequence alignment was 97.89%.

Figure S2

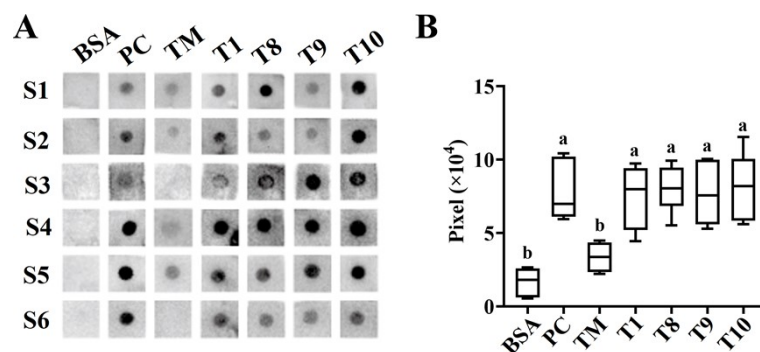

**Figure S2 Analysis of IgE-binding activity in four T-cell epitopes from *O. oratoria* TM.** (A) IgE-binding activity of four T-cell epitopes was analyzed by inhibition dot blot assay; Primary antibody, the sera from shrimp-sensitive individuals (S1~S6) of Table 1 with a dilution of 1:2. BSA, BSA was spotted on the nitrocellulose membranes and acted as a negative control group; PC, the primary antibody is the sera from shrimp-sensitive individuals without inhibitor; TM, TM used as an inhibitor was pre-incubated with the primary antibody; T1, T8~T10, four T-cell peptides used as inhibitor were pre-incubated with the primary antibody; Secondary antibody, the goat anti-human IgE antibody with a dilution of  $1:2 \times 10^4$ . (B) The IgE-binding activity of T-cell epitopes was quantitatively analyzed using the ImageJ software. Data were presented as mean  $\pm$  standard deviation (SD) and they were compared with a one-way ANOVA based on the Tukey test. Significant differences ( $p < 0.05$ ) between the samples were labelled as “a, b, c...”, the difference of different marked letters is substantial.

Figure S3

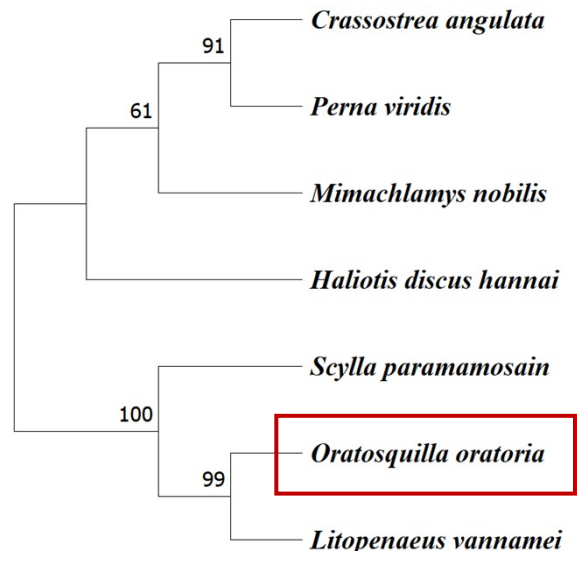

Figure S3 Phylogenetic tree analysis of TM between *O. oratoria* and other shellfish.
